# Supplementary material for: WCSGNet: a graph neural network approach using weighted cell-specific networks for cell-type annotation in scRNA-seq
Source: Front Genet. 2025 Feb 17;16:1553352. doi: 10.3389/fgene.2025.1553352 (PMC11872911; doi:10.3389/fgene.2025.1553352)
Supplement: Supplementary file 3 [file Table1.xlsx]

## Sheet: Table S1
Table S1. Imbalance degree of nine different scRNA-seq datasets.
Dataset	Imbalance Degree
Baron (Human)	0.267443
Baron (Mouse)	0.292022
Muraro	0.176299
Segerstolpe	0.201575
AMB	0.362641
TMa	0.227061
Zheng 68k	0.216691
Zhang T	0.0766507
Kang	0.217155
a. TM: Tabula Muris

## Sheet: Table S2
Table S2. F1-Scores for all cell types across nine methods and nine scRNA-seq datasets
Dataset	Cell Type	WCSGNet	scGraph	LDA	NMC	RF	SVM	SingleR	CHETAH	ACTINN
Zhang T	CD4_C01-CCR7	0.797533	0.861345	0.844622	0.712512	0.737676	0.884254	0.815516	0.768873	0.843943
	CD4_C02-ANXA1	0.75698	0.829932	0.790521	0.701973	0.68617	0.835539	0.816616	0.744344	0.798528
	CD4_C03-GNLY	0.822086	0.872832	0.807947	0.611399	0.476596	0.75	0.867692	0.849231	0.673993
	CD4_C04-TCF7	0.692868	0.727554	0.702128	0.615193	0.526863	0.757252	0.70571	0.587219	0.745865
	CD4_C05-CXCR6	0.761976	0.811897	0.772544	0.668158	0.66188	0.806735	0.70646	0.660177	0.779686
	CD4_C06-CXCR5	0.769585	0.841629	0.81592	0.727273	0.603448	0.888383	0.803922	0.744921	0.837209
	CD4_C07-GZMK	0.690027	0.79	0.784	0.341534	0.262295	0.706215	0.66092	0.59009	0.57485
	CD4_C08-IL23R	0.693333	0.725275	0.673973	0.324528	0.430464	0.725061	0.563953	0.575569	0.679901
	CD4_C09-CXCL13	0.817857	0.859779	0.864662	0.688129	0.609302	0.877064	0.853933	0.785586	0.848148
	CD4_C10-FOXP3	0.799439	0.834437	0.813031	0.740854	0.617544	0.86612	0.794603	0.736686	0.789474
	CD4_C11-IL10	0.58125	0.627078	0.622711	0.44164	0.135417	0.69863	0.61244	0.36039	0.641638
	CD4_C12-CTLA4	0.953683	0.952234	0.964179	0.826295	0.881128	0.965517	0.924182	0.892989	0.95935
	CD8_C01-LEF1	0.884735	0.844884	0.930818	0.710744	0.853333	0.95092	0.854054	0.874251	0.896774
	CD8_C02-GPR183	0.632302	0.735905	0.584746	0.511494	0.142857	0.557522	0.607143	0.64752	0.577947
	CD8_C03-CX3CR1	0.903267	0.920984	0.90559	0.814917	0.838746	0.906098	0.890357	0.861345	0.881212
	CD8_C04-GZMK	0.786325	0.814545	0.809444	0.660471	0.704315	0.8212	0.715584	0.600722	0.776608
	CD8_C05-CD6	0.803674	0.803653	0.843931	0.763906	0.656552	0.844394	0.743992	0.513471	0.807649
	CD8_C06-CD160	0.88359	0.906555	0.915835	0.875362	0.88604	0.931624	0.861401	0.673435	0.894587
	CD8_C07-LAYN	0.893948	0.915254	0.908645	0.727273	0.852514	0.928955	0.866328	0.794206	0.912448
	CD8_C08-SLC4A10	0.444444	0.562092	0.219512	0.326087	0	0.557692	0.574074	0.18797	0.307692
Kang	B cells	0.977626	0.983945	0.911179	0.953488	0.974378	0.980616	0.963991	0.879967	0.974164
	CD14+ Monocytes	0.950545	0.93243	0.837616	0.877159	0.92892	0.953357	0.927338	0.907197	0.956446
	CD4 T cells	0.976906	0.959151	0.904995	0.902223	0.960696	0.974068	0.950841	0.571625	0.974413
	CD8 T cells	0.843439	0.801543	0.632627	0.666667	0.76501	0.832937	0.694033	0.445288	0.843045
	Dendritic cells	0.839196	0.825397	0.758427	0.574324	0.707692	0.862245	0.554257	0.746067	0.822281
	FCGR3A+ Monocytes	0.834382	0.790237	0.564163	0.778029	0.704961	0.841121	0.791297	0.776699	0.851382
	Megakaryocytes	0.604444	0.577143	0.452675	0.138482	0.38674	0.542857	0.4375	0.0624442	0.489796
	NK cells	0.890388	0.907499	0.787153	0.798341	0.886986	0.908893	0.766491	0.728313	0.910299
Zheng 68k	CD14+ Monocyte	0.86239	0.790741	0.813284	0.658686	0.785779	0.776231	0.761882	0.7402	0.800697
	CD19+ B	0.820003	0.774547	0.789094	0.730363	0.794643	0.784759	0.784472	0.748251	0.73748
	CD34+	0.918478	0.867725	0.843658	0.66899	0.647482	0.346915	0.807339	0.0229044	0.74
	CD4+ T Helper2	0.218978	0.133333	0	0.0244173	0	0.0115607	0.0259179	0.00360317	0
	CD4+/CD25 T Reg	0.704264	0.5186	0.503224	0.333012	0.370294	0.556817	0.0628733	0.0683392	0.612483
	CD4+/CD45RA+/CD25- Naive T	0.348968	0.457866	0.344593	0.13991	0.0127864	0.336198	0.125025	0.0310155	0.383545
	CD4+/CD45RO+ Memory	0.569082	0.397219	0.342716	0.265485	0.0224863	0.369672	0.256404	0.0515021	0.420696
	CD56+ NK	0.914432	0.867835	0.895776	0.785329	0.873008	0.899253	0.848649	0.73477	0.915509
	CD8+ Cytotoxic T	0.776541	0.614503	0.651825	0.499511	0.684765	0.714579	0.329217	0.273473	0.770632
	CD8+/CD45RA+ Naive Cytotoxic	0.786046	0.733263	0.677146	0.553901	0.720073	0.748975	0.315341	0.0605066	0.760226
	Dendritic	0.813017	0.706286	0.744098	0.565261	0.666265	0.70101	0.670401	0.603715	0.744549
Baron Human	acinar	0.985417	0.980146	0.978568	0.935714	0.972136	0.987952	0.918633	0.948882	0.985959
	activated_stellate	0.975352	0.9627	0.955437	0.808511	0.948854	0.971731	0.90939	0.893458	0.97373
	alpha	0.993557	0.99115	0.990133	0.97643	0.978894	0.993778	0.984848	0.967528	0.993136
	beta	0.989883	0.987904	0.981318	0.939909	0.977535	0.988742	0.979351	0.961193	0.989519
	delta	0.970149	0.97275	0.965748	0.929147	0.946655	0.972659	0.964587	0.929674	0.970248
	ductal	0.988858	0.982293	0.977113	0.890355	0.967772	0.986072	0.938416	0.924032	0.986518
	endothelial	0.998012	0.98998	0.973631	0.952381	0.971545	0.981818	0.932203	0.943396	0.981818
	epsilon	0.914286	0.684211	0.823529	0.8125	0	0.848485	0.882353	0.75	0.2
	gamma	0.970297	0.934579	0.970646	0.888889	0.820276	0.982456	0.962227	0.956863	0.963532
	macrophage	0.990991	1	0.952381	0.921569	0.910891	0.990826	0.981481	0.981481	0.971963
	mast	0.980392	0.980392	0.90566	0.120482	0.93617	0.980392	1	0.979592	1
	quiescent_stellate	0.954023	0.937853	0.947674	0.717822	0.889552	0.934911	0.851613	0.892216	0.934524
	schwann	1	0.962963	0.96	0.916667	0	0.96	1	0.923077	0.761905
Muraro	acinar	0.968889	0.971047	0.964126	0.902613	0.971047	0.973333	0.951965	0.939815	0.971047
	alpha	0.98825	0.988264	0.988235	0.838298	0.988379	0.994468	0.985112	0.96499	0.992602
	beta	0.961712	0.958286	0.958192	0.804348	0.96288	0.961538	0.957494	0.947248	0.960718
	delta	0.979058	0.978947	0.969072	0.687117	0.973684	0.984293	0.986877	0.957895	0.984211
	duct	0.952965	0.952577	0.949084	0.87033	0.956879	0.958678	0.909091	0.904863	0.960986
	endothelial	0.952381	0.952381	0.97561	0.833333	0.95	0.97561	0.97561	0.95	0.97561
	mesenchymal	0.963415	0.951807	0.963415	0.865497	0.968944	0.957055	0.908046	0.975	0.969325
	pp	0.961165	0.933333	0.942308	0.303972	0.93401	0.956522	0.946341	0.866071	0.946341
Segerstolpe	PSC	0.990826	0.990654	0.971963	0.942308	0.990654	1	1	0.951456	1
	acinar	0.994536	0.997245	0.99169	0.951289	0.991736	0.994505	0.99169	0.971751	0.994505
	alpha	0.994246	0.991917	0.994266	0.981308	0.997138	0.998853	0.998279	0.984866	0.997709
	beta	0.996198	0.996198	0.994329	0.973783	0.986867	0.996212	0.996212	0.988462	0.994329
	delta	0.977778	0.986547	0.962963	0.777385	0.95283	0.995434	0.995434	0.976744	0.986175
	ductal	0.996058	0.998686	0.994764	0.962366	0.994751	0.998686	0.994764	0.948966	0.997368
	endothelial	1	0.9375	1	0.875	1	1	1	0.928571	1
	gamma	0.997429	0.975	0.987277	0.979275	0.994872	1	0.997442	0.992248	0.994872
AMB	GABAergic	0.999911	1	0.999911	0.991827	0.999734	0.999911	0.999646	0.995013	0.999734
	Glutamatergic	0.99993	0.99993	0.99993	0.993459	0.99993	0.99993	0.99979	0.983376	0.99986
	Non-Neuronal	1	0.982456	1	1	0.962963	1	0.981818	0.943396	0.981818
TM	B cell	0.972285	0.976702	0.980675	0.901556	0.980201	0.988823	0.847968	0.324015	0.817923
	DN1 thymic pro-T cell	0.611111	0	0.708861	0.143969	0	0.72973	0.0870425	0.0911681	0.0444444
	Fraction A pre-pro B cell	0.810811	0.470588	0.672566	0.565445	0.679245	0.844444	0.625	0.0519481	0.426471
	Langerhans cell	0.986667	0.891566	0.90411	0.695652	0.618182	0.90411	0.469799	0.0279851	0.5
	T cell	0.936362	0.956099	0.962073	0.860825	0.945062	0.977853	0.874452	0.276462	0.675862
	alveolar macrophage	0.981132	0.986975	0.984035	0.951952	0.982558	0.991379	0.988539	0.511727	0.61516
	basal cell	0.980892	0.984694	0.983565	0.92249	0.996188	0.993647	0.982456	0.191111	0.623077
	basal cell of epidermis	0.942605	0.971246	0.978675	0.90501	0.972426	0.987473	0.96715	0.316154	0.820478
	basophil	0.983607	0.867257	0.95082	0.637931	0.904348	0.983333	0.929134	0.28169	0.537815
	bladder cell	0.992908	0.9921	0.991708	0.863132	0.992126	0.996267	0.560822	0.40132	0.795171
	bladder urothelial cell	0.985458	0.984602	0.989761	0.929529	0.995723	0.995726	0.967635	0.0235492	0.769296
	blood cell	0.971581	0.92787	0.907407	0.652621	0.894338	0.976991	0.608253	0.260385	0.627592
	cardiac muscle cell	0.991597	0.991597	0.983607	1	1	1	0.991736	0.0525478	0.616667
	ciliated columnar cell of tracheobronchial tree	0.989691	1	0.938776	0.934783	0.923077	1	1	0.764045	0.555556
	classical monocyte	0.803279	0	0.826498	0.677419	0.786441	0.935385	0.608163	0.0820513	0.526646
	dendritic cell	0.854167	0.528	0.229508	0.247678	0	0.269231	0.283737	0.282828	0.130435
	duct epithelial cell	0.928571	0.794118	0.777778	0.0828221	0.76	0.776119	0.680851	0.00240385	0.176471
	early pro-B cell	0.96124	0.822581	0.890411	0.752941	0.926829	0.984848	0.945736	0.271605	0.575758
	endocardial cell	0.96875	0.96875	0.95082	0.460251	0.82243	0.992	0.272727	0.602151	0.601626
	endothelial cell	0.978497	0.974862	0.977591	0.86725	0.958476	0.987008	0.840261	0.369997	0.676745
	endothelial cell of hepatic sinusoid	0.964286	0.947368	0.912281	0.931034	0.564103	0.982456	1	0.126697	0.489796
	epithelial cell	0.953582	0.956822	0.953196	0.563741	0.957955	0.968553	0.916468	0.123167	0.620531
	erythroblast	0.936306	0.955414	0.938272	0.692875	0.934708	0.964169	0.870662	0.0346457	0.575949
	fibroblast	0.962637	0.94577	0.95672	0.538682	0.733894	0.982222	0.309641	0.183486	0.757238
	granulocyte	0.971899	0.897856	0.957055	0.918206	0.961905	0.982118	0.909763	0.591837	0.66069
	granulocytopoietic cell	0.932271	0.729904	0.955026	0.866385	0.94526	0.973615	0.847337	0.0305344	0.621053
	hematopoietic precursor cell	0.911227	0.849825	0.912	0.596757	0.874346	0.952986	0.832151	0.0187793	0.599483
	hepatocyte	0.990302	0.99002	0.994628	0.996308	0.994363	0.997738	0.99802	0.704755	0.948448
	immature B cell	0.825758	0.782946	0.566667	0.138508	0.535032	0.84	0.0906643	0.131455	0.46
	immature T cell	0.955466	0.964126	0.963919	0.511317	0.922835	0.984328	0.874183	0.46365	0.937524
	keratinocyte	0.938939	0.964818	0.969628	0.832061	0.960027	0.982891	0.956156	0.161727	0.750123
	kidney capillary endothelial cell	0.972903	0.966321	0.953765	0.60199	0.907331	0.984576	0.754032	0.558376	0.622047
	kidney cell	0.844444	0.0792079	0.20339	0.167665	0	0.483871	0.096475	0.166667	0.0784314
	kidney collecting duct epithelial cell	0.961538	0.854123	0.939394	0.576923	0.934757	0.959538	0.888337	0.238762	0.644783
	kidney loop of Henle ascending limb epithelial cell	0.956978	0.725664	0.983122	0.806331	0.985138	0.992577	0.990456	0.433364	0.641791
	kidney proximal straight tubule epithelial cell	0.987448	0.992866	0.994172	0.941799	0.996672	0.997918	0.998749	0.644029	0.77349
	late pro-B cell	0.925926	0.937269	0.951267	0.526163	0.960452	0.986717	0.840909	0.0766551	0.60687
	leukocyte	0.654843	0	0.590291	0.331675	0.505543	0.702602	0.503371	0.0755245	0.399247
	luminal epithelial cell of mammary gland	0.976087	0.970999	0.975983	0.751553	0.972497	0.986928	0.77665	0.0626305	0.634361
	lung endothelial cell	0.915888	0.956429	0.939597	0.900585	0.901869	0.972797	0.925307	0.732886	0.665936
	macrophage	0.915625	0.750721	0.821741	0.345809	0.781217	0.916822	0.177632	0.102009	0.538745
	mast cell	0.8	0.0582524	0.723404	0.619718	0.4	0.88	0.88	0.026738	0.454545
	mesangial cell	0.918367	0.859649	0.808081	0.585987	0.657895	0.942308	0.445415	0.325581	0.509804
	mesenchymal cell	0.981368	0.983094	0.986726	0.832978	0.97922	0.995051	0.833579	0.325184	0.865516
	mesenchymal stem cell	0.936945	0.910677	0.952967	0.6922	0.901857	0.981149	0.711806	0.363949	0.69978
	monocyte	0.95302	0.865467	0.916981	0.856865	0.886406	0.962822	0.884254	0.158895	0.622605
	myeloid cell	0.825581	0.506122	0.448	0.244989	0.0449438	0.855346	0.193252	0.06	0.457143
	natural killer cell	0.964673	0.956804	0.974239	0.854464	0.959885	0.974941	0.94783	0.593838	0.629505
	neuroendocrine cell	0.831956	0.760248	0.780822	0.210709	0.720779	0.87482	0.614334	0.150385	0.510204
	non-classical monocyte	0.913043	0.611599	0.824	0.602247	0.791011	0.929825	0.747082	0.402597	0.569565
	proerythroblast	0.950758	0.942272	0.957009	0.576	0.954198	0.971751	0.888438	0.212121	0.588235
	promonocyte	0.908411	0.482051	0.890196	0.8	0.85259	0.930966	0.849023	0.00775194	0.570328
	skeletal muscle satellite cell	0.968839	0.977273	0.964639	0.856051	0.968116	0.985915	0.650046	0.280667	0.625714
	stromal cell	0.963384	0.936452	0.967822	0.639486	0.940725	0.982088	0.665164	0.335719	0.800495
	type II pneumocyte	0.977528	0.966667	0.965116	0.934132	0.921212	0.994413	0.994413	0.504202	0.59887
Baron Mouse	B_cell	1	1	0.888889	0.952381	0.888889	1	1	0.947368	0.888889
	activated_stellate	1	0.962963	0.833333	0.833333	0.133333	1	1	1	0.782609
	alpha	0.936709	0.934673	0.919355	0.924731	0.910941	0.966057	0.734774	0.747604	0.928934
	beta	0.991587	0.988751	0.949733	0.98484	0.985075	0.992187	0.926567	0.971429	0.98615
	delta	0.965517	0.958525	0.916468	0.904863	0.924779	0.963801	0.923434	0.892157	0.945946
	ductal	0.996377	0.996364	0.977695	0.987109	0.987387	0.99635	0.996364	0.988971	0.996364
	endothelial	0.99639	0.985401	0.942966	0.958801	0.974729	0.981685	0.97037	0.934866	0.981818
	gamma	0.849315	0.740741	0.576271	0.773333	0.047619	0.923077	0.632911	0.47619	0.481481
	macrophage	0.986301	0.986301	0.986301	0.986301	0.986301	1	0.986301	0.895522	1
	quiescent_stellate	1	0.947368	0.957447	0.910891	0.895833	0.978723	0.968421	0.94382	0.947368

## Sheet: Table S3
Table S3. Details of the TM Dataset.
Cell Type	Number
B cell	8294
mesenchymal cell	7848
basal cell of epidermis	4424
T cell	4409
stromal cell	3240
keratinocyte	3076
endothelial cell	2843
hepatocyte	1764
immature T cell	1354
macrophage	1320
bladder cell	1203
kidney proximal straight tubule epithelial cell	1198
bladder urothelial cell	1167
blood cell	1139
mesenchymal stem cell	1136
natural killer cell	1054
epithelial cell	871
granulocyte	725
monocyte	525
kidney loop of Henle ascending limb epithelial cell	471
lung endothelial cell	462
luminal epithelial cell of mammary gland	459
kidney collecting duct epithelial cell	443
kidney capillary endothelial cell	392
hematopoietic precursor cell	392
basal cell	392
granulocytopoietic cell	378
neuroendocrine cell	362
skeletal muscle satellite cell	354
alveolar macrophage	345
leukocyte	324
proerythroblast	265
late pro-B cell	265
promonocyte	257
fibroblast	226
non-classical monocyte	220
classical monocyte	161
erythroblast	155
immature B cell	113
type II pneumocyte	89
myeloid cell	87
Fraction A pre-pro B cell	66
early pro-B cell	65
endocardial cell	63
basophil	61
cardiac muscle cell	60
mesangial cell	51
ciliated columnar cell of tracheobronchial tree	49
kidney cell	45
DN1 thymic pro-T cell	44
dendritic cell	42
Langerhans cell	38
endothelial cell of hepatic sinusoid	28
duct epithelial cell	27
mast cell	24
SUM	54865

## Sheet: Table S4
Table S1. Sparsity of nine different scRNA-seq datasets after cell filtering
Dataset	Sparsity
Baron (Human)	0.892112
Baron (Mouse)	0.889612
Muraro	0.727287
Segerstolpe	0.720311
AMB	0.755711
TMa	0.903205
Zheng 68k	0.972763
Zhang T	0.844193
Kang	0.984052
a. TM: Tabula Muris

## Sheet: Table S5
Table S5. Details of the Preprocessed Baron Human Dataset.
Cell Type	Number
beta	2525
alpha	2326
ductal	1077
acinar	958
delta	601
activated_stellate	284
gamma	255
endothelial	252
quiescent_stellate	173
macrophage	55
mast	25
epsilon	18
schwann	13
SUM	8562

## Sheet: Table S6
Table S6. Hub Genes Specific to Each Cell Type on the Baron Human Dataset.
acinar	activated_stellate	alpha	beta	delta	ductal	endothelial	epsilon	gamma	macrophage	mast	quiescent_stellate	schwann
ERCC3	KCNJ13	PVRL2	FAM213A	MAGEH1	DAXX	SPATA42	SLA2	SRRM1	HSPB9	EPB41	CANX	CRLF3
AK8	IGDCC4	EFHD2	SNX8	REL	SLC25A46	PKDREJ	RAB23	PTBP1	FZD1	NSD1	ACVR1	SLC38A5
KCNH6	RYK	HDX	CRTC2		ADTRP	RGL4	FAM189A1	FAM149B1	PTGFR	GAPDH	GNL1	GJB3
CCDC158	KEL	GPR4	IL17D		MTR	CMYA5	CBLN1	MYZAP	AGAP1	CRNDE	FEN1	IZUMO2
PARD3B	EPM2A	HSPA1A	GLRB		BTC	MIMT1	AMPD1	GIMAP5	PRH1	DCTPP1	DBF4	GSG1L
NANOS1	CEP162		ADAMTS17		SMCO4	NAT10	BRAP		CLEC4F	GYPB	ADAMTS10	RBBP9
DNPH1	FAM183B		EXOSC8		C4BPA	CLSPN	ESR2		CLRN3	LIMS2	ADCY5	PODXL
CCDC155	HMGB2		FOXD1		HIST2H4B	ALKBH2	SPRYD3		FYCO1	PCGF6	PCDH20	PPP1R2
PAQR8	MMP26		RNF168		CCM2	SH3TC2	PCDHGA11		CIC	NTMT1	LMNB1	SIGMAR1
NANOGNB	CLDN18		BTK		PSME1	CYP46A1	GABBR2		FZD5	CCDC167	GNB5	PYY2
KRTAP4.12	SOCS3		KIAA0226		C11orf98	PDZRN4	ANO7P1		KIAA1456	KDF1	DAZAP2	DAGLA
CLEC18B	ENDOG		ARSK		HMGB1	ADAR	FCER1G		SPARC	LIN37	GTF2IRD2	DGCR6
NANOG	CEP19		MAGEB6P1		HOXC4	DLGAP3	ADCY7		FZD4	IGKV3.20	SRD5A2	STK40
CCDC162P	CHRNB1		JADE1		CDC27	MIR210HG	EMP2		CAMK4	KLHL35	CKLF.CMTM1	HSPA1B
HIST1H2AA	NOTCH1		PCDH1		CABP7	DALRD3	CHRFAM7A		PPIL2	CAMTA2	FAM209B	MAGEE2
CLMN	PPDPF		MCM9		KHNYN	CTNNA3	ST3GAL5		CNR1	C9orf66		GRIN2A
C19orf66	KIF17				PJA1	GJB4	B3GAT2		BST2	ATP5L		SCRT1
CHAF1B	EHD4				POLRMT	PBRM1	KNTC1		FZD10	TAS2R14		PCDH18
FAM120B	ACVR1C				RTN4IP1	PPP1R14C	NSMCE2		GPR32	HNRNPKP3		MYH13
FARP2	GON4L				FBXO43	DOPEY2	BACE2		SFR1	FOXO1		ATG14
CCDC157	HSPA13				NDUFA7	CARTPT	MOCS3		ACTRT3	HNF4G		LRP12
ANKEF1	DNMT3A				SAPCD2	FAM60A	CHM		IKZF1	PLA2G6		RTKN
CHAC1	RTP4				IL22	HAR1A	FUBP1		IFT52	PLCB2		KPNA6
ALDOB	SPATA16				CCL23	GFRA2	GNAT2		PRDM1	GAST		FBRS
CLEC18A					HNRNPH1	DNA2	HSD52		SPATA6L	MESDC1		NDUFA5
PCSK9						ADCK2	MAGI1		FZD6	PSMD13		PLXNA3
FGF10						EPHA4	NFAM1		BTBD10	ADAL		CHD1L
KPNA1						LYSMD4	HYDIN		MYPN	CAPN3		ETAA1
MYCNOS						POFUT1	DSCC1		EN1	FCF1		PAK6
EXOSC3						ACTL6A	RAI2		MYEF2	CHAC2		CBARP
RNF126						SLC25A45	RTCB		CLEC3B	PCBP2		RESP18
NRXN3						NAA25	LPPR2		TARS	APOE		RTN2
CDHR5						DMWD	HOGA1		MPZL1	ASCC3		PP7080

## Sheet: Table S7
Table S7. High-weight Edges Specific to Each Cell Type on the Baron Human Dataset.
acinar	activated_stellate	alpha	beta	delta	ductal	endothelial	epsilon	gamma	macrophage	mast	quiescent_stellate	schwann
NANOG-NOTCH2NL	CENPU-POP4	AIM1L-SLC35F5	FLNA-IL17D	CCR9-F2R	HIVEP3-HJURP	GLTP-POMZP3	C1orf226-NSUN5	IL21R-NSUN5	BTBD10-GPX6	FAM169B-IGF2BP3	MPHOSPH10-POP4	CHST8-N4BP2L1
CCDC157-CCDC159	CEP162-CEP170	FAM129C-GPR4	ADAMTS17-SLC35F5	CLEC1B-RAD51B	PIWIL2-PIWIL3	GPS2-NDUFA6	CARS2-NAP1L5	NFYC-SCAND1	ANO7-HMGXB4	C20orf24-IGF2BP3	DHX30-GNL1	EXOC7-PSMC6
PAQR6-RNF126	CENPU-SAP30BP	IL21R-SLC35F5	GPATCH11-RNF168	CHAT-F2R	PLCB4-SETBP1	GFI1B-NAP1L5	H2AFB1-RHOXF1	IL21R-MMRN1	ACOT1-PRDM1	C20orf24-GNPDA2	C1orf189-CENPT	KPNA6-KPNA7
CHAF1B-PAQR6	CHRNB1-SAP18	CFAP97-SLC35F5	DEFB129-FLNA	RHOXF1-SHQ1	CASP6-PIWIL3	DCP2-GPBP1	ARHGAP6-EXO5	NSUN5-SDR39U1	ACOT1-CAPSL	ADGRF2-CAMTA2	CENPT-DHX30	AFF4-CARS2
NOTCH2NL-NOX4	CENPU-GLTP	CDK2-KRTAP4.4	GPATCH11-JADE1	DHPS-RHOXF1	POLR3B-SETBP1	DGKH-GFRA2	PCDHGA11-SOX12	ANXA6-CUX1	CARD11-CARD8	CHAC2-PPP4R2	B3GALT4-GLT6D1	KDM7A-RAD54L2
CLEC18A-PAQR6	ADGRG5-SAP18	CHST9-SCAND1	GPATCH11-GPATCH8	DAZAP1-REG4	CAND2-PLCB4	GPBP1-NAT10	LTA4H-SLCO6A1	HEBP2-JAKMIP3	ACOT1-SPARC	APLP1-C20orf24	ACYP2-GLCCI1	KDM7A-RECQL5
CCDC157-CLEC18A	CEP19-KDM7A	GLS2-SLC35F5	GPATCH11-MMP8	CDK2-HOXA7	ANKLE2-SETBP1	DNA2-NAT10	HGH1-HOGA1	CCR7-NFYC	ELAC1-FZD5	CAPN3-KLHL35	GLCCI1-GLCE	CENPT-KDM7A
HIST1H2AA-MYCNOS	GON4L-SAP18	AIM1L-GPR4	GPATCH11-MIP	CLEC2D-MPO	HIST2H4B-PKD1L3	DNAI2-PBRM1	CNR2-ERBB2	MRPL13-PLEKHG4B	ACOT1-FZD4	HES1-PKD1L2	CENPT-RANBP3L	PJA2-PKD1L3
CH25H-NOX4	EPM2A-SAP18	GPR4-SLC35F5	ADAMTS17-GGTLC1	HEBP2-RAD51B	SCAMP4-SETBP1	CARTPT-NAT10	AHCY-MPRIP	MIP-SLC35F5	ACOT1-PLA2G4E	C20orf24-PLA2G6	ADCY5-GLCCI1	KPNA4-KPNA7
CDHR5-MYCNOS	CENPV-EPN1	EXOC1-MMRN1	ADAMTS17-FLNA	CLEC1B-HIST2H2BF	CLEC2D-POP1	DGKH-NAA25	EXO5-HGH1	BCS1L-DCTN1	CARD11-CLEC4D	BDH2-PLCB2	BLMH-POP4	ATG14-RPLP0P2
HIST1H2AA-NOTUM	CEP170B-RANBP3L	ELOVL7-GPR4	F2R-GPATCH11	DCTN1-REG4	CASP6-SETBP1	GPBP1-GPS2	CPXM2-GPBP1	IL21R-SRRM1	HNRNPK-RBMXL2	FAM114A1-HMGXB4	BLMH-CCDC146	FBRS-IFITM5
CCDC162P-CLEC18A	CEP162-SAP18	C1orf226-SLC35F5	GPATCH11-MMRN1	DHPS-F2R	PIWIL3-SHISA7	DCP2-GFI1B	CLEC4D-MPRIP	LHX5-NFYC	ACOT1-C20orf24	CAPN3-FAM114A1	DHX30-GLT6D1	CMTM1-SAP30BP
CCDC157-CHAF1B	CENPU-HTRA1	H2AFB1-SLC35F5	GPATCH11-MRC2	CLEC2D-GPATCH8	HIVEP3-SHISA7	DMWD-NAT10	GIMAP6-SPATA13	NFYC-SLC35F5	CCDC146-CLEC4D	HNF4G-SIAH1	GLT6D1-GPRC5B	HEBP2-HS3ST2
CCDC157-PAQR6	C1orf189-CENPU	CDK2-DNM1P35	DMP1-FLNA	CCR9-PAGR1	RAET1K-SESN3	DGKH-HAR1A	ESR2-IGHG3	F2R-RHOXF1	CLEC4F-FBXL14	CAMTA2-MAP3K1	ADAMTS10-LMNB1	CASP6-MSR1
CDHR5-NOTUM	CENPT-CENPU	PCDH19-SDR39U1	GPATCH11-RAD51B	CPXM1-DAZAP1	HJURP-SHISA7	DMWD-RPS24	CCDC112-EXO5	ANXA6-MIP	HNRNPK-PMS1	SIAH2-SLC5A12	ADAMTS10-BLMH	HOXB7-SESN3
CCDC159-MYCNOS	NOTCH1-SAP18	ARHGAP6-SLC35F5	DEFB129-GPATCH11	IGHG3-PAGR1	HIST2H4B-SESN3	GPS2-NAA25	ARHGAP6-FAM129C	ARHGAP6-SCAND1	CARD11-FZD1	FAM114A1-SIAH3	ADAMTS10-PCDH20	CHD1L-RAI1
CHAF1B-NOTUM	ADGRG5-CEP170	EXOC1-SLC35F5	ABCC13-FLNA	FRYL-REG4	RNF8-SESN3	GFRA2-MRPL10	GPRIN3-LHX5	IL21R-RGS9BP	GPX6-SLC5A12	FAM114A1-GAST	ADAMTS10-LYSMD3	FAM83C-LRRC75B
NANOG-PAQR6	CEP120-SAP18	KRTAP4.4-SLC35F5	DMP1-PRRT4	RAD51B-RHOXF1	PIWIL3-SCAMP4	CARTPT-MRPL10	CD82-PPP1R14B	NFYC-SDR39U1	ANO7-SLC5A12	MESDC1-OPRD1	ADAMTS10-CKLF.CMTM1	MEIS1-NADSYN1
CCDC162P-MYCNOS	CEP170-KDM7A	EXO5-SLC35F5	DEFB129-GGTLC1	MGLL-REG4	ANKLE2-HLF	CARTPT-GPBP1	CLEC1B-PTCHD1	ARHGAP6-NFYC	BTAF1-FZD1	BDH2-PIP5KL1	GLT6D1-LYSMD3	CLEC2D-HOXB9
CH25H-PAQR6	CENPU-CHRNB1	FAM129C-SORBS3	GPATCH11-IL17D	REG4-SCAND1	GAB3-HIST2H4B	CDH1-CLSPN	BTBD11-GPR37L1	CCR9-NFYC	CLEC4F-HMGXB4	CHAC2-OPRD1	ADAMTS10-GLCCI1	EMILIN1-RANBP3L
CCDC159-CHAF1B	CENPU-KDM7A	CHST9-MMRN1	BTBD11-GGTLC1	MRC2-RAD51B	HIST2H4B-SHISA7	GPS2-NUFIP2	JAKMIP3-MRPL13	BCS1L-CCR9	HMGXB4-HNRNPK	C20orf24-CAMTA2	ADAMTS10-GLT6D1	CBARP-LRRC4C
CCDC157-NOTCH2NL	CENPU-ENPP5	CDK2-EXOC1	GGTLC1-PAGR1	C1orf226-CLEC2D	ANKLE2-CDC26	DGKH-RANBP3L	JAKMIP3-RHOXF1	CLEC2D-SMARCE1	ACOT1-CLEC4F	NSD1-RBMXL2	GLTP-MPHOSPH10	DAGLA-GEMIN2
CCDC162P-CDHR5	KDM7A-POP4	CDK2-CHAT	GGTLC1-GLRB	MMP8-PAGR1	CCL23-HNRNPH1	CDH1-MRPL10	MYH13-PRR5	GIMAP5-GIMAP6	CARD11-RBMXL2	CAPN10-CAPSL	CENPT-CEP170B	DAGLA-IL20RA
CHAF1B-NANOG	CENPT-CENPV	CDK2-PVRL2	F2R-GGTLC1	REG4-SMC1A	PLXNA4-SETBP1	DGKH-GPBP1	HEBP2-NFAM1	PLEKHG4B-RGS9BP	CARD8-FYCO1	ATP5L-HES1	COMMD2-GJA1	CLEC2D-PAK6
CLEC18A-MYCNOS	LYSMD3-SAP18	FAM129C-MMRN1	GALR3-GGTLC1	DHPS-DMP1	HIST2H4B-SETBP1	GFI1B-NDUFA6	MTCL1-NDUFA7	JAKMIP3-RGS9BP	BTAF1-CLEC4F	FAM114A1-SIAH1	HHAT-LMNB1	FAM110D-FAM160A2
CHAC1-PAQR6	ADGRG5-B3GALT4	ELOVL7-SLC35F5	GPATCH11-SORBS3	BTBD11-CLEC2D	RNF8-SETBP1	CDH1-GPBP1	ACOT9-GPATCH11	MIP-RGS9BP	BST2-CARD8	FAM114A1-OPRD1	BLMH-GTF2IRD2	CDC34-KDM7A
CHAC1-MYCNOS	CEP170B-CEP19	EXOC1-SDR39U1	GGTLC1-MRC2	CCR7-PAGR1	GAB3-HMGB1	GFI1B-SH3TC2	PTCHD1-RHOXF1	BCS1L-IL21R	CLEC2D-FZD6	C1orf162-FAM114A1	CENPT-GLT6D1	GPS2-LAMP3
MYCNOS-NOTCH2NL	SAP18-SOCS3	CHST9-SDR39U1	EXOSC8-PRRT4	CPXM1-REG4	HJURP-RNF8	GFI1B-NAA25	ACOT9-REG4	CLEC1B-LHX5	ACOT1-ETV4	CYP21A2-GNPDA2	CEP126-GLT6D1	HMCES-RANBP3L
CH25H-CHAC1	CEP170-EPN1	C1orf43-SLC35F5	BTBD11-SLC25A40	PLEKHG4B-REG4	GNL3L-SETBP1	GPS2-NAP1L5	PCDHB10-RGS9BP	CLEC1B-SMARCE1	C20orf24-CARD11	HES1-PCBP1	BLMH-GLCE	NADSYN1-SLC25A42
MYCNOS-NANOG	CENPV-SAP18	SDR39U1-SORBS3	GPATCH11-SLC25A40	CLEC2D-PCDHB10	HIST2H2BF-RNF8	CARTPT-GFI1B	MAP3K1-SLCO6A1	ARHGAP6-ELOVL7	ACOT1-LRRC8E	HNF4G-KLHL35	ADAMTS10-DHX30	APELA-LRRC75A
NOTUM-RNF126	KBTBD4-SAP18	IL17RA-MMRN1	F2R-FLNA	REG4-SMIM3	ANKLE2-ANKRA2	ACTL6A-GFI1B	GOPC-LPPR2	MMRN1-NFYC	FZD6-GPX6	GNPDA2-NKX2.5	BLMH-MPHOSPH10	ANKLE2-MYH4
CCDC157-CDHR5	CEP120-EPN1	MGLL-SLC35F5	GPATCH11-PTBP2	ANXA6-PAGR1	HIVEP3-RNF8	DGKH-GFI1B	ETV4-GCHFR	CD209-NFYC	CLEC4F-FZD1	C1orf162-CAMTA2	ADAMTS10-GLCE	CHST8-FAU
PAQR6-PAQR8	HTRA1-SAP18	KRTAP4.4-MPP7	GGTLC1-IL17D	CLEC1B-MFSD12	PIWIL3-PKD1L3	CDH1-DNAI2	SLC35F5-SMARCE1	MRPL13-SLC35F5	BTAF1-BTBD10	FAM114A1-HES1	LYSMD3-MPHOSPH10	GAB3-NACA
CCDC159-HIST1H2AA	CENPO-SAP18	GPR4-MMRN1	CHAT-GPATCH11	CLEC2D-SHISA7	ANKLE2-IL22	DGKH-NOVA2	RBAK-RHOXF1	ANXA6-NFYC	BST2-FYN	GAST-PPP4R2	CEP170B-GLCCI1	FAU-RAD54L2
CCDC162P-NOX4	PPDPF-SAP18	GLTP-SLC35F5	FRAT1-GDPD2	GCHFR-HEBP2	NACA-SHISA7	CARTPT-CDH1	GIMAP6-JAKMIP3	CUX1-NFYC	ACOT1-BTAF1	OSTM1-SIAH2	DHX30-GLCE	ACYP2-DBF4
CH25H-CLEC18A	CENPV-CEP170B	DNM1P35-FAM129C	DMP1-GGTLC1	GPATCH8-RHOXF1	ANKLE2-POLR3B	RAET1G-RPS24	CSMD1-F2RL1	FAM149B1-NFYC	FZD5-RASGRP3	NKX2.5-SIAH1	GLCE-GLTP	RAD54L2-SLC25A42
CHAC1-NOTUM	CENPV-CEP162	CDK2-MFSD12	ABCC13-MMP8	CLEC2D-RHOXF1	PIWIL3-POLR3B	CARTPT-DNAI2	CLEC2D-DNM1P35	NSUN5-RGS9BP	CLEC4F-GPX6	APLP1-OPRD1	GLB1L2-RANBP3L	HLA.DQA1-PIWIL1
CH25H-PAQR7	HOXB7-SAP18	SAP18-SLC35F5	FLNA-GLRB	CPXM1-MMP8	ANKLE2-SAPCD2	CARTPT-HAR1A	GPR37L1-RHOXF1	CDK2-RGS9BP	CARD11-GPX6	BTNL9-HES1	CENPT-KBTBD4	MPRIP-PKD1L3
CCDC159-NOX4	CENPO-CENPU	DNM1P35-GPR4	BTBD11-DMP1	REG4-REL	HJURP-SETBP1	DNAI2-NDUFA6	GLS2-KRTAP4.4	MIP-MRPL13	CLEC4F-LRRC8E	APLP1-BDH2	BLMH-DHX30	FAU-FBRS
MYCNOS-NOX4	CENPU-EPN1	CCR7-CDK2	FLNA-GPATCH11	REG4-SDR39U1	ANKLE2-POP1	NAA25-NDUFA6	CLEC4D-HEBP2	NFYC-PLEKHG4B	CLEC4F-SLC5A12	CAPN3-SIAH1	GLT6D1-MPHOSPH10	DGKH-KDM7A
CCDC157-MYCNOS	CEP170-ENPP5	DNM1P35-SLC35F5	CRTC2-GPATCH11	MMP8-PTCHD1	SETBP1-STXBP6	CDH1-NAA25	AHCY-GPR37L1	CDK2-PLEKHG4B	CARD11-ELAC1	NSD1-SLC5A12	GLTP-LYSMD3	N4BP2L1-RAI1
NOTCH2NL-PAQR7	CEP19-SAP18	EXO5-MMRN1	FLNA-GGTLC1	GPATCH8-JAKMIP3	PIWIL3-RNF8	GFI1B-RPS24	HJURP-MPRIP	IL21R-PLEKHG4B	IFT52-RASGRP3	C20orf24-RBMXL2	C1orf189-GLT6D1	GIMAP7-HHAT
CCDC157-NOX4	CENPU-CEP19	CDK2-MPP7	CCR7-GPATCH11	HOXA7-PAGR1	HIST2H2BF-HIVEP3	ACTL6A-NAA25	GPR37L1-JAKMIP3	GIMAP8-NFYC	CARD11-FZD5	BDH2-CAMTA2	CEP120-GLT6D1	HS6ST2-SESN3
CDHR5-CHAC1	CENPO-CEP170	MPP7-SLC35F5	ADAMTS17-MMP8	F2R-MMP8	ANKRA2-CLEC2D	CDH1-DCP2	PLCB4-RHOXF1	ANXA6-CCR7	ACOT1-MYEF2	CAMTA2-GNPDA2	CEP170B-GLT6D1	HEBP2-OCLM
NANOGNB-PAQR6	DGKH-SAP18	PVRL2-SLC35F5	ABCC13-GGTLC1	C1orf226-CLEC1B	ANKLE2-SCAMP4	NAT10-RGL4	F2RL3-NFAM1	ANXA6-C2CD4B	FZD10-FZD5	CARS2-SDPR	CCDC146-GLCCI1	NACA-PKD1L3
MYCNOS-RNF126	LHX5-SAP18	SCAND1-SLC35F5	DMP1-SLC35F5	REG4-SORBS3	HIVEP3-PIWIL3	GFI1B-NUFIP2	ANO7P1-PCDH19	CDK2-MIP	CARD11-FZD6	CHAC2-HES1	BLMH-PCDH20	AJUBA-ANKLE2
CHAF1B-NOTCH2NL	CEP164P1-CEP170	CDK2-GLTP	CCR9-GGTLC1	CLEC2D-JAKMIP3	HIST2H2BF-PKD1L3	DGKH-MIMT1	NFAM1-PVT1	ANXA6-CDK2	FZD5-SLC5A12	GAST-HES1	GLB1L2-GLT6D1	KDM7A-RYK
NOX4-RNF126	CENPV-POP4	MMRN1-SORBS3	EXOSC8-GPATCH11	CLEC1B-GIMAP6	ANKRA2-POLRMT	NAA25-RPS24	CLEC1B-RGS9BP	CLEC1B-DMP1	ACOT1-BST2	FCF1-NTAN1	BLMH-CENPU	DUSP3-MAGEE2
CDHR5-NOTCH2NL	EPN1-SAP18	SLC35F5-SPATA13	GPATCH11-PRRT4	MMP8-RAD51B	PIWIL2-SETBP1	CEP126-DGKH	ANXA6-MPRIP	MIP-NFYC	ACOT1-POLD3	GAST-HNF4G	BLMH-CENPV	GAB3-SESN3
CDHR5-PAQR6	DFFA-SAP18	GPR4-SDR39U1	GGTLC1-LSM14B	CPXM1-SLC35F5	CAND2-SETBP1	NAT10-NOVA2	FAM189A1-RTCB	DCTN1-NFYC	ACOT1-GPX6	AKR1C8P-OPRD1	GLCCI1-LMNB1	CARS2-NACA
PAQR6-POLR3H	CEP170-CHRNB1	MMRN1-PCDH19	ABCC13-PRRT4	GDF7-GDF9	ANKLE2-PJA1	DGKH-SH3TC2	CD36-FXYD2	ELOVL7-SCAND1	CARD8-CLEC4F	AKR1C8P-PCBP1	GLTP-GPRC5B	CDH1-MYOZ3
CDHR5-NOX4	KEL-SAP18	CHST9-SLC35F5	GGTLC1-MMRN1	CHAT-PAGR1	HIVEP3-SESN3	NDUFA6-NOVA2	APOBEC2-PSMC3IP	ANXA6-GIMAP6	ELAC1-RBMXL2	GNPDA2-OPRD1	DHX30-GLCCI1	ATG14-SLC25A42
NOTUM-RASL12	HSPA13-SAP18	PCDH19-SLC35F5	GPATCH11-SNX8	CLEC1B-JAKMIP3	ANKLE2-CDC42BPG	DCP2-GPS2	CD36-IGHA1	PCDH19-SCAND1	ACOT1-CARD8	ADAL-CHAC2	BLMH-CEP170B	C1orf189-MTCL1
CCDC159-NANOGNB	C1orf189-SAP18	FAM129C-PCDH19	GGTLC1-SORBS3	NOVA2-RAD51B	NACA-PIWIL3	GFRA2-GLTP	CNDP2-ESR2	IL21R-NFYC	BTBD10-FZD6	CAPN3-CHAC2	BLMH-CENPT	HOXB9-RASGRF2
CCDC159-RASL12	CEP170-DFFA	MFSD12-SLC35F5	CCDC110-GGTLC1	RAD51B-REG4	HIST2H4B-RNF8	CARTPT-DMWD	EXO5-NSUN5	MIP-PLEKHG4B	BST2-BTAF1	PIP5KL1-PLA2G6	GLB1L2-HHAT	NACA-PJA2
CCDC159-PAQR7	ADGRG5-CENPU	CCR7-FAM129C	CRTC2-GGTLC1	CRIP1-REG4	ANKLE2-KHNYN	DGKH-DMWD	EXOC1-GIMAP7	NFYC-PTMS	CARD8-KIAA1456	CHAC2-PLCB2	GLB1L2-LYSMD3	CDV3-MAK16
NANOGNB-NOTCH2NL	B3GALT4-KDM7A	FAM129C-SLC35F5	GPATCH11-PLEKHG4B	CDK2-PAGR1	NPAS2-PIWIL3	DMWD-GFI1B	NFAM1-RHOXF1	MRPL13-NFYC	CLEC1B-FBXL14	IGF2BP3-PIP5KL1	GLT6D1-RANBP3L	CEP250-RANBP3L
MYCNOS-RASL12	NUFIP2-SAP18	GPR4-SCAND1	GGTLC1-SLC35F5	REG4-SETBP1	ANKLE2-HMGB1	GPS2-NAT10	FAM129C-NOX4	RGS9BP-SDR39U1	FZD5-IKZF1	NKX2.5-NSD1	ADAMTS10-HHAT	KDM7A-MYH4
CCDC162P-NOTCH2NL	RYK-SAP18	MFSD12-MPP7	GLRB-SLC35F5	MMRN1-PAGR1	HIVEP3-PKD1L3	GFRA2-GPS2	GIMAP6-MAP3K1	C2CD4B-NFYC	FZD1-FZD5	IGF2BP3-SIAH2	CEP170-DHX30	CRLF3-PIWIL1
CDHR5-RASL12	CENPU-RANBP3L	CDK2-GPR4	GALR3-GPATCH11	FLNA-REG4	ANKLE2-HIVEP3	DCP2-RPS24	GPR37L1-NFYC	MIP-MMRN1	CARD8-SLC5A12	IGF2BP3-OSTM1	GLB1L2-POP4	GLB1L2-RPLP0P2
CCDC159-CLEC18A	SAP18-SAP30BP	GPR4-PCDH19	GPATCH11-PAGR1	CHAT-REG4	HIST2H2BF-SHISA7	DGKH-GPS2	JAKMIP3-PCDH19	NFYC-PTBP1	HMGXB4-RASGRP3	BDH2-OPRD1	DBF4-DHX30	CASP6-OSGEP
PAQR7-RASL12	CEP170-RBAK	POLR3G-SLC35F5	CHAT-GGTLC1	MIP-PIWIL3	HIST2H4B-HJURP	MRPL10-RPS24	FXYD2-IGHA1	ARHGAP6-C1orf226	ACOT1-RBMXL2	CHAC2-LIMS2	C1orf189-LYSMD3	HMCES-IZUMO2
CCDC162P-RASL12	CEP19-RANBP3L	ELOVL7-SDR39U1	ADAMTS17-F2R	F2R-REG4	POLR3B-RNF8	DNAI2-RGL4	CLEC4D-FANCE	HEBP2-PSMC3IP	FBXL14-PMS1	GNPDA2-IGF2BP3	CENPT-CMTM7	ABHD2-IZUMO2
HIST1H2AA-PAQR6	CENPV-CEP19	GPR4-SORBS3	GDF10-GPATCH11	FLNA-RAD51B	EPCAM-PIWIL3	GFI1B-GPS2	CLEC1B-DEFB129	AIM1L-IL21R	CLEC2D-HMGXB4	HES1-SIL1	BLMH-GLT6D1	NTN4-RCAN2
CDHR5-CLEC18A	CENPU-EPM2A		BTBD11-GPATCH11	ABCC13-RAD51B	RAET1K-SETBP1	PBRM1-RPS24	REL-RHOXF1	JAKMIP3-MIP	CLEC1B-CLEC4F	BTNL9-CAPN3	CEP170-GTF2IRD2	IZUMO2-LRP12
CH25H-RASL12	CENPV-RANBP3L		ADAMTS17-GPATCH11	CPXM1-PAGR1	GAB3-PIWIL3	DGKH-SPATA42	GPR37L1-NFAM1	KNSTRN-KPNA7	CLEC4F-FZD5	BTNL9-C1orf162	CHRNA6-GLT6D1	GREB1L-RAI1
CCDC159-CDHR5	CEP170-CEP19		GGTLC1-PRRT4	CPXM1-DHPS	PIWIL3-PLCB4	NDUFA6-RPS24	MSRB2-PAFAH1B1	CDK2-NFYC	BST2-FZD5	AFF4-IGF2BP3	DAZAP2-DHX30	DNAI2-MYOZ3
NOTCH2NL-RASL12	B3GALT4-EPN1		C11orf45-C11orf49	DAZAP1-PAGR1	PKD1L3-SETBP1	NAA25-PBRM1	MORC2-NTM	NFYC-POSTN	CARD8-FZD4	AGPS-PLA2G6	ADAMTS10-GLB1L2	GLTP-HMGA2
CCDC162P-PAQR6	CEP170-HTRA1		FLNA-LSM14B	PCDH12-REG4	PIWIL3-PJA2	MRPL10-NAT10	JAKMIP3-NHLRC3	DMP1-JAKMIP3	FYCO1-FZD10	FAM114A1-RGS12	CENPT-GLCE	CHST8-RESP18
CHAC1-CHAF1B	ENPP5-SAP18		ADAMTS17-GLRB	CCR9-REG4	HIST2H2BF-SETBP1	GFI1B-MRPL10	HJURP-NHLRC3	PLEKHG4B-SDR39U1	CARD11-RASGRP3	CAPN3-FCF1	CENPT-GLCCI1	IFITM5-RNF103.CHMP3
CAPN9-PAQR6	CENPU-CEP162		GLRB-GPATCH11	ABCC13-DHPS	ANKLE2-HNRNPH1	CDH1-RPS24	GABBR2-SLCO6A1	GTF3C1-NFYC	ALDH1B1-KLHL4	AKR1C8P-C20orf24	BLMH-CKLF.CMTM1	CHST8-PIWIL1
NOTUM-NOX4	RANBP3L-SAP18		CCR9-GPATCH11	CCR7-MMP8	HIVEP3-SETBP1	EPHA4-GFI1B	DNM1P35-NSUN5	GPATCH11-SCAND1	CARD8-HMGXB4	AP5S1-CAPS2	GLB1L2-GLCCI1	CASP6-CLEC2D
CCDC159-CHAC1	CENPU-LYSMD3		BTK-GPATCH11	DAZAP1-MMP8	PIWIL3-PLXNA4	NAP1L5-NAT10	CLEC4D-FRAT1	ANXA6-SLC35F5	CARD11-CLEC1B	FAM114A1-PCBP1	BLMH-LYSMD3	KDM7A-OCLM
CHAF1B-MYCNOS	CEP162-CEP19		GGTLC1-MMP8	DHPS-RAD51B	ANKLE2-NPAS2	CEP126-GFI1B	CHST9-SPATA13	NFYC-NSUN5	CLEC2D-CLEC4F	APOE-FAM114A1	CENPT-MPHOSPH10	CBARP-FBRS
CDHR5-CH25H	B3GALT4-CEP19		GPATCH11-MAGEB6P1	FAM102A-REG4	ANKLE2-PLXNA4	NDUFA6-PBRM1	MSRA-PAFAH1B1	AIM1L-PLEKHG4B	ANO7-FZD5	KLHL35-SIAH2	BLMH-DAZAP2	CARS2-SLC51A
CDHR5-CHAF1B	RBAK-SAP18		BTBD11-FLNA	ESR2-REG4	ANKRA2-POP1	DGKH-RPS24	LPPR2-RAI2	ARHGAP6-CCR9	BTBD10-FZD5	C1orf162-CHAC2	GLT6D1-GNL1	CHST8-GEMIN2
CLEC18A-NOTUM	CEP170B-KDM7A		ABCC13-IL17D	DMP1-HEBP2	CDC42BPG-RNF8	DGKH-NAT10	F2RL3-GPR37L1	IL21R-MIP	CLEC1B-SLC5A12	CHAC2-IGF2BP3	B3GALT4-BLMH	PLXNA3-RAI1
CH25H-RNF126	CMTM7-SAP18		DMP1-MMP8	MPRIP-REG4	HMGB1-PIWIL3	DGKH-DNAI2	CNR2-COX18	BCS1L-CDK2	ACOT1-ACTRT3	GAST-SIAH1	DHX30-LMNB1	CEP250-SAP30BP
CCDC162P-CHAC1	CENPU-RBAK		DMP1-GPATCH11	BTBD11-GPATCH8	ANKLE2-HIST2H2BF	DNA2-GFI1B	DHPS-DNM1P35	C1orf226-RGS9BP	ACOT1-CIC	FAM114A1-RBMXL2	GLCE-HHAT	PIP5K1A-RYK
CLEC18A-NOTCH2NL	B3GALT4-CEP162		GGTLC1-RHOXF1	CCR7-REG4	SETBP1-SHISA7	GLTP-NOVA2	C1orf226-MRPL13	GIMAP5-NFYC	FNTA-HMGXB4	AKR1C8P-GAST	GLT6D1-HHAT	CASP6-DGCR2
CCDC157-NANOG	CEP170B-EPN1		GPATCH11-LSM14B	MMRN1-REG4	HIST2H2BF-PIWIL3	GLTP-NUFIP2	ARL11-RHOXF1	AIM1L-ELOVL7	FZD5-HMGXB4	PLA2G6-PPP4R2	GLCCI1-GLT6D1	EPCAM-PJA2
CH25H-CHAF1B			GPATCH11-RHOXF1	BTBD11-CLEC1B	HIST2H4B-PIWIL2	DCP2-NDUFA6	ACOT9-NFYC	PLEKHG4B-SCAND1	CARD11-CLEC2D	C1orf162-SIAH1	GLCE-GLT6D1	APELA-GSG1L
CLMN-PAQR6			ABCC13-GPATCH11	GPATCH8-REG4	RNF8-SHISA7	CDH1-GFI1B	FRAT1-NHLRC3	AIM1L-NFYC	FZD4-FZD6	BTNL9-LLPH	BLMH-GLTP	FRMD7-SAP30BP
NOX4-PAQR6			CCDC110-GPATCH11	FLNA-NOVA2	HIST2H4B-PIWIL3	DNAI2-RPS24	FAM189A1-LURAP1L	MAGED2-NFYC	FZD5-RPN1	ATP5L-KLHL35	DGKH-GLT6D1	DYDC2-KDM7A
CH25H-NOTCH2NL			FAM102A-GPATCH11	RAD51B-SHQ1	HIVEP3-PIWIL2	GFI1B-GLTP	MPRIP-OCLM	IL21R-SCAND1	CLEC4F-IFT52	CAMTA2-CTHRC1	DHX30-GLB1L2	RAD54L2-SAP30BP
NANOG-NOX4			EXOSC8-FLNA	CLEC1B-PCDHB10	ANKLE2-HJURP	CEP126-GLTP	CNR2-PCDHGA11	C1orf226-NFYC	ACOT1-HNRNPK	LIMS2-PCBP1	CENPT-HHAT	CASP6-PIWIL2
CCDC162P-NOTUM			EXOSC8-GGTLC1	CLEC2D-CPXM1	ANKLE2-RNF8	CEP126-NUFIP2	HIST2H2BF-PTCHD1	C1orf226-CCR9	ACOT1-SLC5A12	PLA2G6-RBMXL2	DBF4-GLCCI1	CDH1-HMCES
NANOG-NOTUM				CCR9-MMP8	HIST2H2BF-HIST2H4B	CLSPN-MRPL10	ESR2-HOXA7	C2orf50-NFYC	FZD1-FZD6	ASCC3-FAM114A1	GLCE-LMNB1	GLCCI1-SESN3
CCDC159-CH25H				CLEC2D-RAD51B	HLF-PIWIL3	NAT10-PBRM1	PIWIL2-RHOXF1	GPATCH11-NFYC	ELAC1-PMS1	CAPN3-GNPDA2	BLMH-HHAT	FLT1-KIF1C
CH25H-MYCNOS				DMP1-MIP	GLCE-SETBP1	DGKH-RGL4	BCS1L-FAM102A	RGS9BP-SCAND1	BTBD10-FZD1	APOE-C1orf162	DHX30-HHAT	EN1-NADSYN1
CHAC1-NOTCH2NL				MRPL13-REG4	HIST2H4B-HIVEP3	CARTPT-PBRM1	CPXM2-NFYC	CHAT-SORBS3	ACOT1-FZD5	HMGXB4-HSPA6	B3GALT4-LYSMD3	GAS1-LRRC75B
CCDC157-CCDC162P				ANXA6-REG4	ANKLE2-HIST2H4B	GLTP-GPS2	ANXA6-CLEC4D	MYO3A-NFYC	CARD11-PMS1	BTNL9-FCF1	BLMH-GLB1L2	ACYP2-RANBP3L
NANOGNB-NOTUM				ABCC13-F2R		DNAI2-GLTP	LTA4H-MPRIP	BCS1L-NFYC	CLEC2D-SLC5A12	KLHL35-NKX2.5	GIMAP7-GLT6D1	CLEC2D-SLC25A46
MYCNOS-NOTUM				CLEC2D-MIP		DCP2-MRPL10	ABHD2-SLCO6A1	IL21R-SDR39U1	BTBD10-CLEC4F	APLP1-RBMXL2	CEP170-GLCCI1	NADSYN1-PAK6
MYCNOS-PAQR6				PKD1L3-REG4		GPBP1-MRPL10	DEFB129-HEBP2	NFYC-RGS9BP	ACOT1-IKZF1	PKD1L2-SLC5A12	GLCCI1-POP4	HOXC4-KDM7A
CH25H-HIST1H2AA				BTBD11-DHPS		IP6K1-SESN3	CDK2-GLS2	AIM1L-PCDH19	ACOT1-CARD11	NTAN1-SIAH1	ADCY5-DHX30	EPCAM-MYH4
CCDC162P-CH25H				CLEC2D-SDR39U1		GFI1B-NAT10	C1orf226-EXO5	CCR9-MIP	CARD8-IKZF1	C20orf24-SIAH1	BLMH-GLCCI1	FXYD2-PCDH18
CCDC157-NOTUM				BTBD11-CPXM1		NAT10-NDUFA6	PTCHD1-SLC51A	ANXA6-DCTN1	ACOT1-FYN	HIST1H4J-OPRD1	BLMH-CEP120	CARS2-FAM49B
CH25H-NOTUM				CPXM1-RAD51B		DGKH-NDUFA6	FRAT1-NFYC	CCR9-RGS9BP	ACOT1-ELAC1	BDH2-PCDHB3	CENPT-GPRC5B	FAU-KDM7A
CCDC162P-CHAF1B				CDK2-MMP8		GFI1B-GFRA2	CARD11-FAM49B	NOVA2-SLC35F5	ACOT1-RASGRP3	HMGXB4-OPRD1	DHX30-PCDH20	CDKL4-MANSC1
CH25H-NANOG				CUX1-REG4		NAP1L5-NDUFA6	GVQW1-HUS1B		ACOT1-CMSS1	APLP1-IGF2BP3	ACYP2-DHX30	MPRIP-RAD54L2
CHAF1B-NOX4				CHAT-MMRN1		GPS2-MRPL10	LHX5-MPO		CARD8-RASGRP3	CAPN3-CAPSL	AHCYL2-AHI1	LYVE1-RAD54L2
CCDC157-CH25H				POLR3G-REG4		CARS2-GFI1B	GLTP-SPATA13		PMS1-RASGRP3	CHAC2-KLHL35	C1orf189-GLTP	CASP6-SESN3
CCDC159-FARP2				CLEC2D-DHPS		DCP2-PBRM1	CLEC4D-SPATA13		FZD5-PMS1	AKR1C8P-CAPSL	DHX30-GLTP	IFITM5-IZUMO2
				GPATCH8-RAD51B		NAT10-RPS24	LRP12-STX11		ARHGAP24-HMGXB4	LIN37-PLA2G6	GLCCI1-HHAT	AGPAT3-EPCAM
				BTBD11-JAKMIP3		DMWD-NAA25	CLEC2D-NFYC		ACOT1-CLEC4D	BDH2-FAM114A1	BLMH-C1orf189	NACA-PSMC6
				DAZAP1-RAD51B		EPHA4-NAT10	CDV3-PAFAH1B1		CARD11-CLEC4F	CAPN3-CAPRIN2	DAZAP2-GLCCI1	CDH1-CYP21A2
				HOXA7-IGHG3		DMWD-PBRM1	C1orf226-FUBP1		CLEC4F-KIAA1456	HMGXB4-SIAH1	CEP120-MPHOSPH10	MYH4-NACA
						NAT10-RAET1G	ARHGAP6-CHRFAM7A		ANO7-FBXL14	CAMTA2-SIAH2	GLB1L2-GLCE	PODXL-RAD54L2
						DNAI2-GPBP1	GPR63-KTI12		ACOT1-MTO1	FAM114A1-IGF2BP3	CEP126-POP4	ANO7-FAM110D
						CARTPT-GPS2	ARHGAP6-PCDH19		ACOT1-AKR1C8P	HIST1H4J-HNF4G	GIMAP7-GLCCI1	L2HGDH-SAP30BP
						GPBP1-SH3TC2	CLEC2D-SMIM3		CIC-FZD5	FAM114A1-SIAH2	GLT6D1-LMNB1	CLEC2D-IGHA1
						GFI1B-GPBP1	BCS1L-MALL		FYN-FZD5	PCBP1-PLA2G6	CENPT-GLB1L2	CAPN9-PIWIL2
						HAR1A-NAT10	GIMAP6-GPR37L1		BST2-CLEC4F	CHAC2-SIAH1	GLCCI1-HNRNPUL1	MYH4-PIWIL2
						HAR1A-NAA25	CEP112-SPATA13		ACOT1-FZD1	HES1-SIAH2	GLCCI1-PCDH20	MYH4-PKD1L3
						DMWD-DNAI2	CHST9-H2AFB1		CALCRL-IBTK	HMGXB4-PCBP1		MPZL1-NADSYN1
						ACTL6A-NAT10	KNTC1-SLC51A		HMGXB4-PTGFR	C20orf24-SIAH2		FAM173B-KEL
						CEP126-RANBP3L	FRAT1-SLC51A		FZD4-GPX6	CAPN10-PCDHB3		DAGLA-SLC25A42
						DGKH-MRPL10	CD300LB-MYH13		FZD4-FZD5	BTNL9-OPRD1		MSRB2-RHBDD1
						DGKH-NAP1L5	SLC38A4-SMCR2		CARD11-FBXL14	APLP1-NKX2.5		CA10-GSG1L
						DGKH-RAET1G	FAM129C-SPATA13		FZD5-GPX6	FAM114A1-LLPH		FBRS-MPRIP
						DGKH-KLRAP1	EXO5-SCAND1		ACOT1-CLEC1B	KLHL35-PCDHB3		ADGRG5-KDM7A
						GPBP1-RPS24	CLEC4D-JAKMIP3		CAPN10-RASGRP3	HIST1H4J-SLC5A12		APELA-IZUMO2
						DGKH-DNA2	EXO5-FAM102A		EN1-PMS1	HIST1H4J-SIAH2		PSMC6-SESN3
						CDH1-DGKH	KNTC1-PSMC3IP		ACOT1-FZD6	AFF4-SIAH2		CHST8-IFITM5
						ALKBH2-NAT10	HUS1B-RHOXF1		CMSS1-HMGXB4	APLP1-SIAH2		FXYD2-RASGRF2
						DCP2-NAA25	CYP1B1-SPATA13		ACOT1-KIAA1456	CAMTA2-LIMS2		CDV3-DAGLA
						NAA25-NAP1L5	CDK2-NFAM1		CLEC4F-RASGRP3	CAPN10-LIN37		COMMD6-LRRC75A
						DNAI2-GFI1B	CLEC1B-GDF9		CARD8-GPX6	EPB41L3-GAST		HOXB9-PKD1L3
						GLTP-SESN3	CAND2-PKD1L3		ELAC1-MYEF2	CAMTA2-SIAH1		ADGRG5-STK40
						CARS2-DGKH	FAM189A1-SPATA13		CAPSL-CLEC4F	PCBP1-SIAH1		FAM160A2-NADSYN1
						DGKH-NUFIP2	HIST2H2BF-PLCB4		CARD11-HMGXB4	NKX2.5-PPP4R2		CHST8-NADSYN1
						CARTPT-NAA25	FAM49B-GPR37L1		CARD8-LRRC8E	PKD1L2-SIAH2		GLCE-PKD1L3
						GFI1B-PBRM1	CD36-CRLF3		C20orf24-CLEC4F	CAPN10-PLCB2		IFITM5-PLXNA3
						NAP1L5-RPS24	CLEC4D-LHX5		CARD8-FZD1	HES1-RBMXL2		ACYP2-DGCR2
						DCP2-NAT10	PIWIL2-SLC4A7		ACOT1-HMGXB4	NKX2.5-SIAH2		ESRP2-HMCES
						GLTP-NDUFA6	CHST9-JAKMIP3		ACOT1-ANO7	NKX2.5-SNX9		CBARP-PKD1
						ACTL6A-DCP2	DNM1P35-EXO5		ACOT1-PMS1	CAPN5-CTHRC1		ANO7-IFITM5
						GPBP1-PBRM1	ARL11-SLC4A7		CARD8-PMS1	MAP3K1-OPRD1		CCDC146-CLEC2D
						CARTPT-DGKH	ADAMTS13-MAP3K1		ACOT1-FZD10	PCBP1-SIAH2		HSPA1B-KEL
						DCP2-DGKH	CLEC1B-MALL		CLEC4F-PLA2G4E	C20orf24-PKD1L2		IRS2-PIWIL1
						DNAI2-NAT10	ANKRD20A11P-C1orf226		CLEC4F-ETV4	BDH2-NKX2.5		GEMIN2-RAD54L2
						CDH1-NAT10	CPXM1-RHOXF1		CARD8-FZD10	KLHL35-SIAH1		IZUMO2-RAI1
						DNAI2-NAA25	HGH1-MYRIP		GRAMD2-KIAA1456	CHAC2-PLA2G6		CHST8-FBRS
						CARTPT-RPS24	FAM169B-GLUD2		ACOT1-BTBD10	FCF1-PKD1L2		ETAA1-PIWIL2
						EPHA4-NAA25	PKD1L3-RASL12		BTAF1-FZD5	CAMTA2-HMGXB4		FAM101B-PIWIL1
						CDH1-SH3TC2	FRAT1-RECQL5		ACOT1-RPN1	CAPN3-LARP4		FAM49B-FBRS
						NAA25-NAT10	C1orf189-PAFAH1B1		CLEC1B-FZD5	CAMTA2-OPRD1		LRRC75A-RTN4RL1
						DGKH-PBRM1	CDK2-FAM189A1		BTBD10-CARD8	ATP5L-NTAN1		KDM7A-SAP30BP
						GPS2-RPS24	HJURP-IL33		ANO7-CARD11	CAMTA2-PCDHB3		PIWIL1-RESP18
						NAT10-SH3TC2	NFYC-SMIM3		CLEC2D-CLEC3B	AFF4-FAM114A1		CBARP-FAM160A2
						CDH1-PBRM1	AHCY-FAM49B		FYCO1-FZD5	APLP1-PLA2G6		EPCAM-PIWIL2
						DNAI2-GPS2	MFSD12-PCDH19		ACOT1-IFT52	EPB41L3-PCDHB3		GJB3-GREB1L
						NAA25-SH3TC2	NHLRC3-OCLM		ACOT1-EN1	OPRD1-PLA2G6		ARL11-GEMIN8
						DCP2-NAP1L5	C1orf226-SHISA7		FZD6-FZD7	AKR1C8P-PKD1L2		ARSG-CARS2
						DCP2-DNAI2	MALL-PAQR6		ANO7-CLEC4F	IGF2BP3-SIL1		CAPN9-SESN3
						GFRA2-RPS24	NHLRC3-RRP9		ANO7-CARD8	OPRD1-PCBP1		CARS2-CDH1
						CARS2-NAT10	FAM129C-H2AFB1		CARD11-LRRC8E	AGPS-B3GNT7		HS6ST2-NACA
						MRPL10-PBRM1	ERCC3-RASL12		ANO7-CAPSL	CAPN3-NKX2.5		MSRB2-RNF130
						MRPL10-SH3TC2	SLC38A4-SNX8		C20orf24-CLEC2D	EPB41-GAST		DAGLA-MAK16
						GFRA2-NAT10	NFYC-NHLRC3		CARD8-CLEC1B	BDH2-IGF2BP3		CDH1-IZUMO2
						GFRA2-NAA25	CRIP1-MPRIP		ANO7-FZD1	FAM114A1-PLA2G6		CLEC2D-HS6ST2
						PBRM1-SH3TC2	FAM129C-NSUN5		ACOT1-SOX10	BTNL9-CAMTA2		FAM101B-RAD54L2
						MRPL10-NAA25	AHCY-CLEC1B		ACOT1-CLEC2D	BTNL9-SIAH1		CHST8-CRLF3
						ACTL6A-DGKH	FRG1-MPO		FZD1-FZD10	IGF2BP3-PLA2G6		CHST8-RAD54L2
						DGKH-EPHA4	MPRIP-SLCO6A1		FZD10-FZD6	PPP4R2-SIAH1		RAI1-RANBP6
							GDF9-GPR37L1		CLEC2D-SETBP1	C1orf162-PCDHB3		CRLF3-FBRS
							AHCY-CA10		ACOT1-FBXL14	CHAC2-FAM114A1		CRLF3-N4BP2L1
							MALL-SESN3		FZD10-FZD4	CAMTA2-ELAC1		FBRS-PPP1R3G
							FANCE-LHX5		CIC-GPX6	IGF2BP3-OPRD1		FAU-SAP30BP
							ARL6IP5-HGH1		ACOT1-CAPN10	CAMTA2-CARD14		ATG14-STK40
							ACOT9-DSCC1		CLEC2D-FZD5	APOE-SIAH2		KBTBD4-RYK
							DNM1P35-LTA4H		CARD11-HNRNPK	PCDHB3-SIAH1		CLEC2D-PKD1L3
							DNM1P35-MPRIP		CLEC4F-IKZF1	AKR1C8P-HIST1H4J		CASP6-HOXD9
							HSD17B13-SLCO6A1		CLEC4F-FYN	IGF2BP3-NSD1		GAB3-PKD1L3
							CLEC1B-GPR37L1		ACOT1-PRH1	HIST1H4J-PPP4R2		FAU-HOXB9
							ACOT9-IL33		FBXL14-SLC5A12	MAPK11-SIAH2		CHST8-LRRC4C
							ARHGAP6-LPPR2		FZD5-FZD6	HES1-NKX2.5		PPP1R3G-SIGMAR1
							ANKRD20A11P-SLC51A		AGAP1-HMGXB4	BTNL9-PCBP1		CBARP-PODXL
							PKD1L3-POLR3B		CARD11-SLC5A12	EPB41L3-LIMS2		DNPH1-PKD1L3
							F2RL3-HEBP2		CLEC1B-HMGXB4	CAPN3-PPP4R2		MCF2-OCLM
							HJURP-NFYC		CLEC4F-FZD6	CHAC2-GAST		PIP5K1A-RTTN
							IL33-OCLM			NKX2.5-PCBP1		CARS2-DGCR2
							BCS1L-SDR39U1			GNPDA2-NSD1		ACYP2-STK40
							CAND2-FAM156A			EPB41L3-MYL1		GJB3-RAI1
							DSCC1-OCLM			CAMTA2-FAM114A1		FXYD2-HOXB9
							C1orf226-C1orf43			HES1-IGF2BP3		ANKLE2-CAPN9
							ABCC13-RHOXF1			IGF2BP3-PCBP1		HOXB9-NACA
							MALL-MPRIP			MED31-RP1L1		N4BP2L1-PODXL
							LTA4H-NFYC			HMGXB4-NKX2.5		AHCY-CCDC146
							CDK2-H2AFB1			FAM114A1-FCF1		CEP170B-FAM160A2
							HMG20A-LHX5			C1orf162-CAPN3		LRRC75B-RAI1
							AJUBA-RRP9			BTNL9-CHAC2		KDM7A-RANBP3L
							FAM189A1-SPATA20			GNPDA2-PCBP1		PIWIL2-SHISA7
							PIWIL2-PTCHD1			APLP1-GAST		AFG3L2-LYSMD1
							ESR2-SCAND2P			CHAC2-SIL1		CAPN9-GLCE
							GABRA3-PARD6A			BTNL9-HIST1H4J		ACYP2-LRP12
							OCLM-PAFAH1B1			PCDHB3-PLA2G6		DGKH-STK40
							CBLN1-FRG1			ADGRF2-KLHL35		DGCR2-HMCES
							MFSD12-SEPT4			IGF2BP3-SIAH1		HSPA1B-PIP5K1A
							F2RL3-RGS9BP			HES1-SIAH1		CLEC2D-PSMC6
							CLEC4D-FCN1			CYP21A2-FAM114A1		CRLF3-RBBP9
							FAM49B-GPBP1			CCDC167-FAM114A1		MPZL1-RAD54L2
							CLEC4D-RGS9BP			CAMTA2-KLHL35		DGCR2-SAP30BP
							ACOT9-IGHG3			HES1-KLHL35		KDM7A-L2HGDH
							MORC3-MPRIP			BTNL9-SIAH2		CHST8-FAM101B
							H2AFB1-SPATA13			PCDHB3-PLCB2		LRRC4C-SLC25A42
							DMRTA2-HOGA1			CAMTA2-PLA2G6		IFITM5-MYH13
							NFYC-RHOXF1			HIST1H4J-SIAH1		FBRS-PAK6
							MAP3K1-SLC25A40			BDH2-SIAH2		PIWIL2-PJA2
							FRAT1-SLC4A7			C20orf24-OPRD1		GREB1L-LRRC75B
							FRAT1-PTCHD1			NTMT1-PCBP1		ANKLE2-CLEC2D
							ETV4-GPATCH8			C1orf162-NTMT1		IFITM5-LRRC4C
							ARHGAP6-CRIP1			FCF1-SIL1		CLEC2D-NADSYN1
							CLEC1B-HNRNPU			AFF4-C20orf24		GLB1-MAGEB2
							ARL11-REL			C20orf24-HES1		CRLF3-LRRC4C
							ABCC13-HJURP			AKR1C8P-FAM114A1		NADSYN1-RAD54L2
							F2RL3-RHOXF1			C1orf162-GNPDA2		CRLF3-IFITM5
							EXO5-RGS9BP			FAM114A1-KLHL35		CBARP-FBXL14
							FRAT1-GPR37L1			CHAC2-RBMXL2		CHST8-CLEC2D
							LPPR2-RGS9			KLHL35-PPP4R2		AFF4-EPCAM
							CLEC1B-MPRIP			NSD1-OPRD1		CDH1-MAP10
							FAM49B-MPRIP			CAMTA2-RBMXL2		AGPAT3-GAB3
							CLEC1B-IL33			AKR1C8P-PCDHB3		MBNL2-PKD1L3
							ETV4-NHLRC3			AKR1C8P-CAPN3		N4BP2L1-NADSYN1
							ACOT9-FAM189A1			ASCC3-PCBP1		MAP10-MYOZ3
							CD300LB-PRR5			APOE-CHAC2		CLEC2D-FAU
							NOVA2-PAQR6			CAPN3-SLC5A12		CDH1-DUSP3
							CDV3-RECQL5			CAMTA2-PCBP1		ANKRD20A11P-ARSG
							FAM189A1-SCAND2P			CARS2-GNPDA2		FAM160A2-SLC25A42
							ARHGAP6-GLUD2			GAST-PLA2G6		CEP250-NOTCH1
							BCS1L-RGS9BP			CAMTA2-PCBP2		ACYP2-GJB3
							MRPL13-SDR39U1			GAST-KLHL35		HS3ST2-MCF2
							FAM49B-FRAT1			NSD1-PCDHB3		CLEC2D-NACA
							COX18-PCDHGA11			CHAC2-GNPDA2		CRLF3-NADSYN1
							GPATCH11-IGHG3			FAM114A1-SIL1		FBRS-MAP10
							FLNA-PTCHD1			FAM114A1-HNF4G		CRLF3-RAD54L2
							CLEC4D-FCGBP			C20orf24-PCBP1		HMGA2-KDM7A
							ANO7P1-CDK2			ADAL-PLA2G6		GLCCI1-HMGA2
							ESR2-FAM189A1			GAST-LIMS2		KDM7A-RTTN
							AHCY-HEBP2			BTN3A2-NTAN1		CRLF3-FAU
							CA10-HEBP2			APLP1-HMGXB4		MPZL1-N4BP2L1
							CCDC112-RGS9BP			C20orf24-FAM114A1		CLEC2D-KDM7A
							BCS1L-PCDHB10			BTNL9-PPP4R2		CNR2-GEMIN8
							CHRFAM7A-POMT1			HIST1H4J-NKX2.5		GEMIN8-MTCL1
							GALR3-PAQR6			NKX2.5-PLA2G6		FRG1-RASGRF2
							CDV3-SLC52A3			PCBP1-RBMXL2		DGCR2-DNAI2
							ARHGAP6-RGS9			CHAC2-NSD1		CACNG2-KCNQ2
							MAOB-MAP3K1			NKX2.5-NTAN1		NUDCD2-RAD54L2
							DEFB129-RTCB			ADGRF2-GMPPA		LRRC75A-PODXL
							IL33-MPRIP			FAM114A1-PCBP2		GLCCI1-GPS2
							CD276-RBM14			HNF4G-SIAH2		MAP10-RAD54L2
							GDF9-RHOXF1			CHAC2-HIST1H4J		KIF1C-LRRC4C
							ADAMTS10-ANO7			CAPN3-IGF2BP3		CDC34-L2HGDH
							CARD11-HMGA2			FCF1-HES1		LRRC75A-OSR1
							MPRIP-NHLRC3			HSPA6-KLHL35		GREB1L-IZUMO2
							GPATCH8-RGS9BP			APLP1-FAM114A1		PLXNA3-RAD54L2
							ANKK1-ODF3B			GAST-SIAH2		IFITM5-SIGMAR1
							ARHGAP6-SEPT4			AFF4-CHAC2		HSPA1B-SLC25A42
							DHPS-LTA4H			FAM114A1-SNX9		IFITM5-PPP1R3G
							ARHGAP6-SPATA13			FAM114A1-LIMS2		KDM7A-KEL
							BCS1L-EXO5			CAMTA2-CAPN3		MYH4-PJA2
							PIWIL2-RGS9BP			LIMS2-OPRD1		CHST8-MPRIP
							CDK2-NSUN5			NTMT1-PLCB2		CAPN9-PKD1L3
							H2AFB1-SLCO6A1			CAPN10-CAPN3		FBRS-NADSYN1
							ANKRD20A11P-GPATCH8			HNF4G-PCBP1		CLEC4D-OCLM
							DSCC1-IL33			SIAH1-SIAH2		FBRS-RAD54L2
							ABCC13-NFYC			C1orf162-IGF2BP3		GLB1L2-RASGRF2
							CNR2-HGH1			HIST1H4J-PCBP1		HMCES-MAP10
							RHOXF1-SLC51A			FCF1-KLHL35		FBRS-RNF103.CHMP3
							CLEC4D-RGS9			CAMTA2-NKX2.5		RANBP3L-SAP30BP
							CLEC2D-MPRIP			MYL1-PCCA		RASGRF2-RHBDD1
							MPRIP-RHOXF1			LIMS2-PLA2G6		FBRS-RESP18
							CLEC2D-SLCO6A1			CHAC2-PCBP1		FAM160A2-RAD54L2
							MALRD1-SLCO6A1			CHAC2-NTAN1		KDM7A-SESN3
							GPR37L1-RAI2			HMGXB4-PKD1L2		GJB3-NTN4
							ANKRA2-COX18			APLP1-PLCB2		ESRP2-RANBP3L
							ACOT9-ESR2			SIAH2-SIAH3		CRLF3-STK40
							CLEC2D-FAM49B			ADAL-FAM114A1		ACYP2-MYH13
							C1orf226-GPATCH8			FAM114A1-NKX2.5		LRRC4C-PIWIL1
							EXOC1-MALL			IGF2BP3-NKX2.5		GJB3-MYH13
							FAM189A1-SLC35F5			BTNL9-FAM114A1		CBARP-SLC25A42
							MALL-PSMC3IP			APLP1-CAPN3		HOXD8-LAMP3
							CLEC4D-NHLRC3			CARS2-CYP21A2		PIP5K1A-SAP30BP
							CARS2-CNR2			SIAH1-SIAH3		FXYD2-TJP2
							FAM189A1-IGHG3			OPRD1-PIP5KL1		CBARP-CRLF3
							FAM189A1-GLUD2			FAM114A1-GNPDA2		CDH1-NKX3.1
							POLR3G-SCAND1			CHAC2-SIAH2		HOXD9-KCNQ2
							DEFB129-IL33			CHAC2-CYP21A2		CBARP-FLT1
							AHCY-RHOXF1			C1orf162-PLCB2		HSPA1B-RAD54L2
							ARL11-HIST2H2BF			ADGRF2-PCBP1		MBNL2-SESN3
							IGHG3-SLC35F5			EPB41L3-PCCA		GLT8D1-KEL
							FAM189A1-GPATCH11			AKR1C8P-PLA2G6		RBMXL2-RCAN2
							DCP2-LTA4H			FAM114A1-HIST1H4J		PAK6-RAD54L2
							RGS9-RRP9			CHAC2-FCF1		ATG14-L2HGDH
							FAM49B-SLCO6A1			CHAC2-ELAC1		GJA1-HPDL
							FAM189A1-RASL12			HIST1H4J-PIP5KL1		GPRIN1-PKD1L3
							LPPR2-RRP9			C1orf162-KLHL35		HEBP2-MCF2
							IL33-NHLRC3			ADAMTSL3-CARM1P1		CASP6-PKD1L3
							ANO7P1-DNM1P35			LIMS2-MYL1		CLRN3-HPDL
							CENPL-MSRB2			CAPN3-HNF4G		CLRN3-GJA1
							GALR3-MRC2			FAM114A1-PKD1L2		CNR2-IZUMO2
							EXO5-SDR39U1			FAM114A1-NSD1		KDM7A-NADSYN1
							FAM49B-LTA4H			CAMTA2-CHAC2		CRLF3-SAP30BP
							FAM49B-MYRIP					GPR63-LMAN2L
							LIPC-MAP3K1					MYOZ3-OCLM
							NHLRC3-RGS9					GLB1L2-GSG1L
							CLEC2D-LTA4H					GEMIN2-LYVE1
							H2AFB1-HSD17B13					HOXB9-HS6ST2
							ANO7P1-FAM189A1					HS3ST2-OCLM
							CDK2-SEPT4					MYH4-SESN3
							PSMD14-PXN					MAP10-RASGRF2
							FCGBP-GABBR2					PODXL-SLC25A42
							LTA4H-PAQR7					EXOC7-RUFY2
							CRY2-PPP1CC					IZUMO2-MAP10
							EXOC1-SESN3					GLT8D1-KDM7A
							CLEC4D-F2RL1					FAM101B-FBRS
							H2AFB1-MALL					DAGLA-RASGRF2
							FXYD7-HGH1					FAM160A2-MPZL1
							HEBP2-MPRIP					CENPT-SESN3
							CDK2-EXO5					DFFA-RCAN2
							DECR1-HJURP					NACA-PIWIL2
												OSR1-RASGRF2
												HTRA1-KDM7A
												CLEC4D-EMILIN1
												ALKBH4-MYOZ3
												NAP1L5-SSTR1
												DGCR2-STK40
												CBARP-NADSYN1
												L2HGDH-RPLP0P2
												CDH1-RANBP3L
												DGCR2-NUCB1
												SESN3-SORL1
